# Supplementary material for: Trophic dynamics of scleractinian corals: A stable isotope evidence
Source: Oxford University Press journal article supplement (doi:10.1242/jeb.115303), 2015-01-01
Supplement: jeb115303supp.pdf [file jeb115303supp.pdf]

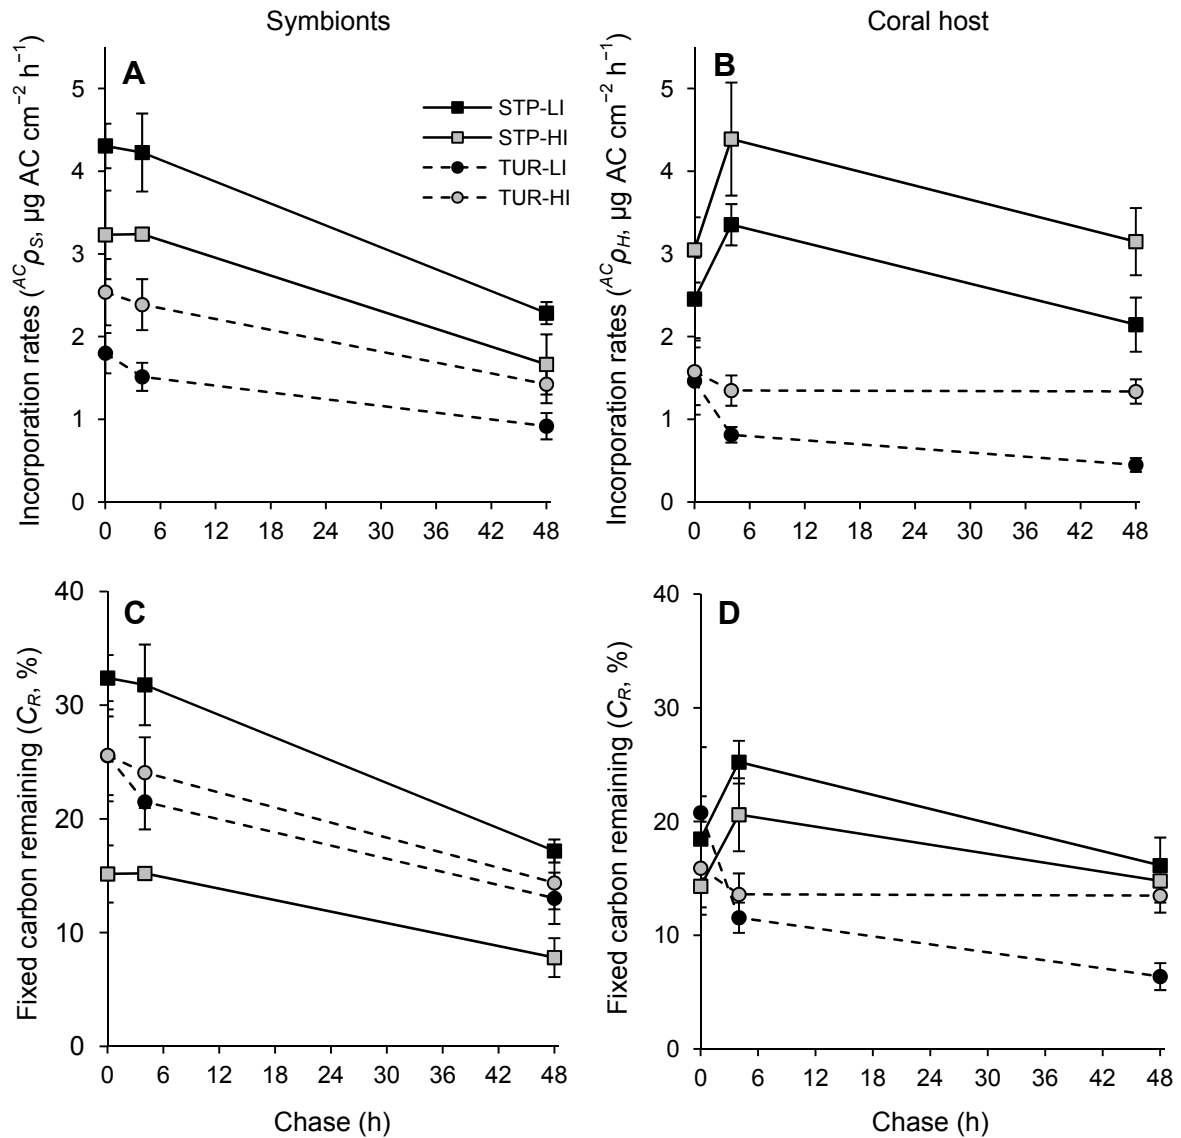

**Fig. S1.** Effect of species and irradiance on the autotrophic carbon (AC) incorporation rates ( $^{AC}\rho$ ) and percentage of fixed AC that remained ( $C_R$ ) in symbiosis.  $^{AC}\rho$  in (A) symbionts ( $^{AC}\rho_S$ ), and (B) coral host ( $^{AC}\rho_H$ ).  $C_R$  in (C) symbionts, and (D) coral host, for *Stylophora pistillata* (STP) and *Turbinaria reniformis* (TUR) maintained at low (LI) and high (HI) irradiance. Data are means  $\pm$  standard errors of the mean of  $n = 3$  measurements.

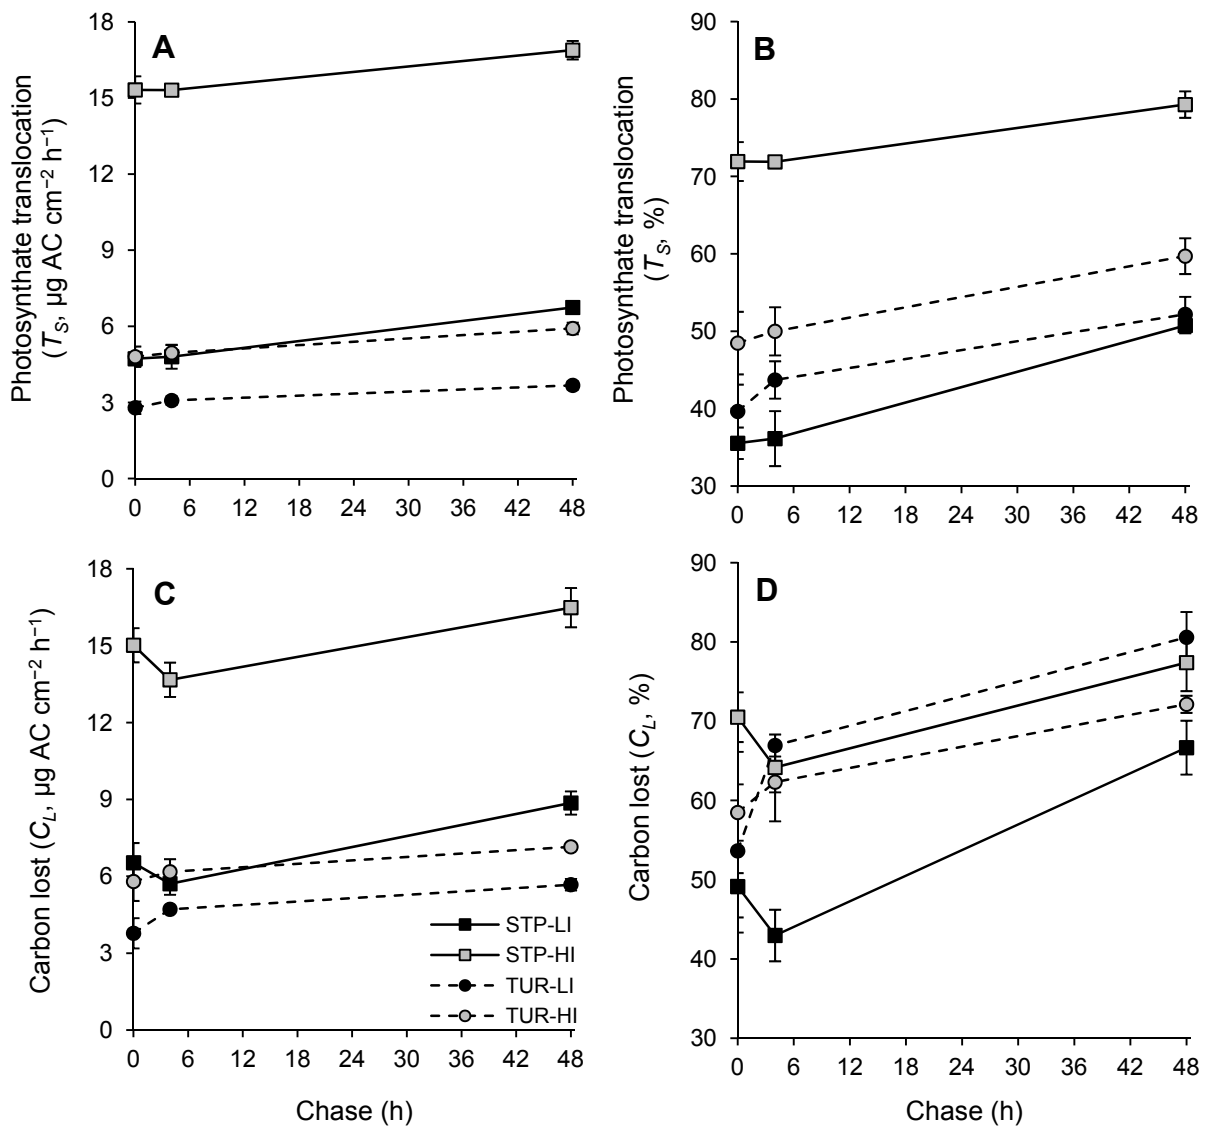

**Fig. S2.** Effect of species and irradiance on the autotrophic carbon (AC) translocated to the host by symbionts ( $T_S$ ), and lost by the holobiont ( $C_L$ ). (A) Amount and (B) percentage of  $T_S$ , and (C) amount and (D) percentage of  $C_L$  for *Stylophora pistillata* (STP) and *Turbinaria reniformis* (TUR) maintained at low (LI) and high (HI) irradiance. Data are means  $\pm$  standard errors of the mean of  $n = 3$  measurements.

**Table S1. Results of the factorial analysis of variance (ANOVA) for symbiont, chlorophyll and protein concentrations as well as calcification, photosynthesis and respiration rates, with two factors (species, and irradiance)**

| Factor                                             | d.f. | <i>P</i>          | <i>F</i> |
|----------------------------------------------------|------|-------------------|----------|
| <i>Symbiont concentration</i>                      |      |                   |          |
| Species                                            | 1    | <b>&lt;0.0001</b> | 206.60   |
| Irradiance                                         | 1    | <b>&lt;0.0001</b> | 73.17    |
| Species × Irradiance                               | 1    | <b>&lt;0.0001</b> | 25.57    |
| Error                                              | 20   | -                 | -        |
| <i>Chlorophyll concentration</i>                   |      |                   |          |
| Species                                            | 1    | <b>&lt;0.0001</b> | 76.14    |
| Irradiance                                         | 1    | <b>&lt;0.0001</b> | 73.30    |
| Species × Irradiance                               | 1    | <b>0.0013</b>     | 14.10    |
| Error                                              | 20   | -                 | -        |
| <i>Calcification rate (<i>C<sub>C</sub></i>)</i>   |      |                   |          |
| Species                                            | 1    | <b>0.0007</b>     | 16.15    |
| Irradiance                                         | 1    | <b>0.0261</b>     | 5.77     |
| Species × Irradiance                               | 1    | 0.6554            | 0.21     |
| Error                                              | 20   | -                 | -        |
| <i>Gross photosynthesis (<i>P<sub>C</sub></i>)</i> |      |                   |          |
| Species                                            | 1    | <b>&lt;0.0001</b> | 102.96   |
| Irradiance                                         | 1    | <b>&lt;0.0001</b> | 39.18    |
| Species × Irradiance                               | 1    | <b>0.0078</b>     | 8.73     |
| Error                                              | 20   | -                 | -        |
| <i>Host respiration (<i>R<sub>H</sub></i>)</i>     |      |                   |          |
| Species                                            | 1    | <b>&lt;0.0001</b> | 50.32    |
| Irradiance                                         | 1    | <b>0.0047</b>     | 10.10    |
| Species × Irradiance                               | 1    | 0.9943            | 0.00     |
| Error                                              | 20   | -                 | -        |
| <i>Symbiont respiration (<i>R<sub>S</sub></i>)</i> |      |                   |          |
| Species                                            | 1    | <b>0.0003</b>     | 19.16    |
| Irradiance                                         | 1    | <b>0.0062</b>     | 9.27     |
| Species × Irradiance                               | 1    | <b>0.0018</b>     | 12.89    |
| Error                                              | 20   | -                 | -        |
| <i>Protein concentration</i>                       |      |                   |          |
| Species                                            | 1    | <b>&lt;0.0001</b> | 63.70    |
| Irradiance                                         | 1    | 0.9244            | 0.01     |
| Species × Irradiance                               | 1    | 0.6074            | 0.27     |
| Error                                              | 20   | -                 | -        |

*N*=6 replicates; significant *P*-values are in bold.

**Table S2. Results of the factorial analysis of variance (ANOVA) for chlorophyll concentration, gross photosynthesis, symbiont respiration, heterotrophic carbon, heterotrophic nitrogen and autotrophic carbon incorporation rates in symbionts as well as autotrophic carbon translocation normalised per symbiont cell, with two factors (species, and irradiance)**

| Factor                                             | d.f. | <i>P</i>          | <i>F</i> |
|----------------------------------------------------|------|-------------------|----------|
| <i>Chlorophyll concentration</i>                   |      |                   |          |
| Species                                            | 1    | 0.2507            | 1.40     |
| Irradiance                                         | 1    | <b>0.0001</b>     | 22.84    |
| Species × Irradiance                               | 1    | 0.0982            | 3.01     |
| Error                                              | 20   | -                 | -        |
| <i>Gross photosynthesis (<math>P_C</math>)</i>     |      |                   |          |
| Species                                            | 1    | <b>0.0002</b>     | 19.81    |
| Irradiance                                         | 1    | <b>&lt;0.0001</b> | 124.20   |
| Species × Irradiance                               | 1    | 0.4772            | 0.52     |
| Error                                              | 20   | -                 | -        |
| <i>Symbiont respiration (<math>R_S</math>)</i>     |      |                   |          |
| Species                                            | 1    | <b>0.0016</b>     | 17.33    |
| Irradiance                                         | 1    | <b>0.0330</b>     | 5.94     |
| Species × Irradiance                               | 1    | 0.1108            | 3.01     |
| Error                                              | 11   | -                 | -        |
| <i>HC incorporation (<math>^{HC}\rho_S</math>)</i> |      |                   |          |
| Species                                            | 1    | 0.2068            | 1.89     |
| Irradiance                                         | 1    | <b>0.0118</b>     | 10.51    |
| Species × Irradiance                               | 1    | 0.0622            | 4.69     |
| Error                                              | 8    | -                 | -        |
| <i>HN incorporation (<math>^{HN}\rho_S</math>)</i> |      |                   |          |
| Species                                            | 1    | 0.1906            | 2.04     |
| Irradiance                                         | 1    | 0.3987            | 0.80     |
| Species × Irradiance                               | 1    | <b>0.0738</b>     | 4.28     |
| Error                                              | 8    | -                 | -        |
| <i>AC incorporation (<math>^{AC}\rho_S</math>)</i> |      |                   |          |
| Species                                            | 1    | <b>0.0066</b>     | 13.24    |
| Irradiance                                         | 1    | <b>0.0048</b>     | 14.96    |
| Species × Irradiance                               | 1    | <b>0.0296</b>     | 6.98     |
| Error                                              | 8    | -                 | -        |
| <i>AC translocation (<math>T_S</math>)</i>         |      |                   |          |
| Species                                            | 1    | <b>0.0022</b>     | 19.56    |
| Irradiance                                         | 1    | <b>&lt;0.0001</b> | 907.63   |
| Species × Irradiance                               | 1    | <b>0.0357</b>     | 6.36     |
| Error                                              | 8    | -                 | -        |

*N*=3-6 replicates; significant *P*-values are in bold.

**Table S3. Percentage of heterotrophic carbon or nitrogen in coral host and symbionts for *Stylophora pistillata* (STP) and *Turbinaria reniformis* (TUR) maintained under low (LI) and high (HI) irradiance**

|                                                                | Short-term experiment |   |        |            |   |        | Long-term experiment |   |        |
|----------------------------------------------------------------|-----------------------|---|--------|------------|---|--------|----------------------|---|--------|
|                                                                | After 4 h             |   |        | After 48 h |   |        |                      |   |        |
|                                                                | mean                  | ± | s.e.m. | mean       | ± | s.e.m. | mean                 | ± | s.e.m. |
| <i>Percentage of heterotrophic carbon (HC) in coral host</i>   |                       |   |        |            |   |        |                      |   |        |
| STP-LI                                                         | 77                    | ± | 4%     | 86         | ± | 2%     | 88                   | ± | 1%     |
| STP-HI                                                         | 68                    | ± | 3%     | 69         | ± | 2%     | 84                   | ± | 1%     |
| TUR-LI                                                         | 77                    | ± | 2%     | 74         | ± | 9%     | 67                   | ± | 1%     |
| TUR-HI                                                         | 60                    | ± | 5%     | 51         | ± | 7%     | 59                   | ± | 6%     |
| <i>Percentage of heterotrophic carbon (HC) in symbionts</i>    |                       |   |        |            |   |        |                      |   |        |
| STP-LI                                                         | 23                    | ± | 4%     | 14         | ± | 2%     | 12                   | ± | 1%     |
| STP-HI                                                         | 32                    | ± | 3%     | 31         | ± | 2%     | 16                   | ± | 1%     |
| TUR-LI                                                         | 23                    | ± | 2%     | 26         | ± | 9%     | 33                   | ± | 1%     |
| TUR-HI                                                         | 40                    | ± | 5%     | 49         | ± | 7%     | 41                   | ± | 6%     |
| <i>Percentage of heterotrophic nitrogen (HN) in coral host</i> |                       |   |        |            |   |        |                      |   |        |
| STP-LI                                                         | 62                    | ± | 5%     | 63         | ± | 2%     | 76                   | ± | 4%     |
| STP-HI                                                         | 64                    | ± | 4%     | 70         | ± | 3%     | 81                   | ± | 1%     |
| TUR-LI                                                         | 64                    | ± | 3%     | 49         | ± | 1%     | 62                   | ± | 6%     |
| TUR-HI                                                         | 57                    | ± | 5%     | 55         | ± | 6%     | 56                   | ± | 9%     |
| <i>Percentage of heterotrophic nitrogen (HN) in symbionts</i>  |                       |   |        |            |   |        |                      |   |        |
| STP-LI                                                         | 38                    | ± | 5%     | 37         | ± | 2%     | 24                   | ± | 4%     |
| STP-HI                                                         | 36                    | ± | 4%     | 30         | ± | 3%     | 19                   | ± | 1%     |
| TUR-LI                                                         | 36                    | ± | 3%     | 51         | ± | 1%     | 38                   | ± | 6%     |
| TUR-HI                                                         | 43                    | ± | 5%     | 45         | ± | 6%     | 44                   | ± | 9%     |

*N*=3 replicates.
